# Supplementary material
Source: PubMed Central journal article supplement (PMC3714588)
Supplement: supp_fj.12-226886_12-226886SuppTable1.pdf [file supp_fj.12-226886_12-226886SuppTable1.pdf]

**TABLE S1: List of human proteins with histidine enrichment in their propeptides**

| UniProt identifier | Name                          | Length propeptide | Histidine content | P(X>=k)  | Cellular location                        | Propeptide type |
|--------------------|-------------------------------|-------------------|-------------------|----------|------------------------------------------|-----------------|
| P12821             | Angiotensin-converting enzyme | 74                | 6.76%             | 2.80E-02 | Secreted, Cell membrane                  | C-terminus      |
| O14672             | ADAM10                        | 194               | 7.73%             | 5.08E-05 | Cell membrane, Endomembrane              | N-terminus      |
| O75078             | ADAM11                        | 202               | 4.46%             | 4.54E-02 | Cell membrane                            | N-terminus      |
| Q9Y3Q7             | ADAM18                        | 168               | 4.76%             | 4.15E-02 | Cell membrane                            | N-terminus      |
| Q9P0K1             | ADAM22                        | 197               | 6.09%             | 2.22E-03 | Cell membrane                            | N-terminus      |
| O75077             | ADAM23                        | 227               | 4.85%             | 1.69E-02 | Cell membrane                            | N-terminus      |
| Q9UKF2             | ADAM30                        | 171               | 4.68%             | 4.52E-02 | Cell membrane                            | N-terminus      |
| Q9BZ11             | ADAM33                        | 174               | 5.17%             | 2.01E-02 | Cell membrane                            | N-terminus      |
| O15204             | ADAM-like protein decysin-1   | 175               | 6.29%             | 2.61E-03 | Secreted                                 | N-terminus      |
| Q9H324             | ADAM-TS10                     | 208               | 5.29%             | 9.33E-03 | Secreted                                 | N-terminus      |
| P58397             | ADAM-TS12                     | 215               | 6.05%             | 1.59E-03 | Secreted                                 | N-terminus      |
| Q8TE57             | ADAM-TS16                     | 255               | 5.88%             | 9.60E-04 | Secreted                                 | N-terminus      |
| Q8TE60             | ADAM-TS18                     | 237               | 5.91%             | 1.34E-03 | Secreted                                 | N-terminus      |
| P59510             | ADAM-TS20                     | 232               | 4.74%             | 1.96E-02 | Secreted                                 | N-terminus      |
| Q9UKP5             | ADAM-TS6                      | 223               | 8.52%             | 1.31E-06 | Secreted                                 | N-terminus      |
| Q9P2N4             | ADAM-TS9                      | 269               | 4.09%             | 4.88E-02 | Secreted                                 | N-terminus      |
| O95972             | Bone morphogenetic protein 15 | 249               | 5.22%             | 5.55E-03 | Secreted                                 | N-terminus      |
| P12643             | Bone morphogenetic protein 2  | 259               | 5.79%             | 1.12E-03 | Secreted                                 | N-terminus      |
| P12644             | Bone morphogenetic protein 4  | 273               | 6.23%             | 2.38E-04 | Secreted                                 | N-terminus      |
| P18075             | Bone morphogenetic protein 7  | 263               | 5.70%             | 1.30E-03 | Secreted                                 | N-terminus      |
| P55287             | Cadherin-11                   | 31                | 12.90%            | 5.36E-03 | Cell membrane                            | N-terminus      |
| Q13634             | Cadherin-18                   | 29                | 17.24%            | 4.82E-04 | Cell membrane                            | N-terminus      |
| P12830             | Cadherin-1                    | 132               | 6.06%             | 1.17E-02 | Cell membrane, Endosome, Golgi apparatus | N-terminus      |
| P14091             | Cathepsin E                   | 34                | 8.82%             | 4.29E-02 | Endosome                                 | N-terminus      |
| P09668             | Cathepsin H                   | 85                | 8.24%             | 3.52E-03 | Lysosome                                 | N-terminus      |
| P43235             | Cathepsin K                   | 99                | 6.06%             | 2.71E-02 | Lysosome                                 | N-terminus      |
| P25774             | Cathepsin S                   | 98                | 8.16%             | 1.97E-03 | Lysosome                                 | N-terminus      |
| Q6YHK3             | CD109 antigen                 | 25                | 12.00%            | 1.92E-02 | Cell membrane                            | C-terminus      |
| P0CG37             | Cryptic protein               | 65                | 7.69%             | 1.70E-02 | Cell membrane                            | C-terminus      |
| Q14126             | Desmoglein-2                  | 26                | 11.54%            | 2.13E-02 | Cell membrane                            | N-terminus      |
| P12259             | Coagulation factor V          | 836               | 3.59%             | 1.27E-02 | Secreted                                 | Internal        |
| P02765             | Alpha-2-HS-                   | 40                | 12.50%            | 2.17E-03 | Secreted                                 | Internal        |

|        |                                      |     |        |          |                                 |                   |
|--------|--------------------------------------|-----|--------|----------|---------------------------------|-------------------|
|        | glycoprotein                         |     |        |          |                                 |                   |
| P09958 | Furin                                | 83  | 6.02%  | 4.28E-02 | Golgi apparatus, Cell membrane  | N-terminus        |
| O60383 | Growth/differentiation factor 9      | 295 | 4.41%  | 2.04E-02 | Secreted                        | N-terminus        |
| P07686 | Beta-hexosaminidase subunit beta     | 79  | 6.33%  | 3.58E-02 | Lysosome                        | N-terminus        |
| P55103 | Inhibin beta C chain                 | 218 | 4.59%  | 3.07E-02 | Secreted                        | N-terminus        |
| P58166 | Inhibin beta E chain                 | 217 | 5.07%  | 1.25E-02 | Secreted                        | N-terminus        |
| P51460 | Insulin-like 3                       | 47  | 14.89% | 9.55E-05 | Secreted                        | Internal          |
| P19827 | ITI heavy chain H1                   | 246 | 4.47%  | 2.84E-02 | Secreted                        | C-terminus        |
| Q99538 | Legumain                             | 110 | 9.09%  | 2.40E-04 | Lysosome                        | C-terminus        |
| P09848 | Lactase-phlorizin hydrolase          | 847 | 3.78%  | 5.15E-03 | Apical cell membrane            | N-terminus        |
| P10253 | Lysosomal alpha-glucosidase          | 42  | 9.52%  | 1.56E-02 | Lysosome                        | N-terminus        |
| P14151 | L-selectin                           | 10  | 20.00% | 2.11E-02 | Cell membrane                   | N-terminus        |
| Q9NRE1 | Matrix metalloproteinase-26          | 72  | 8.33%  | 6.34E-03 | Secreted                        | N-terminus        |
| P16519 | PCSK2                                | 84  | 8.33%  | 3.29E-03 | Secretory vesicle               | N-terminus        |
| P29122 | PCSK6                                | 86  | 5.81%  | 4.86E-02 | Secreted, Endoplasmic reticulum | N-terminus        |
| P01127 | PDGF subunit B                       | 112 | 5.36%  | 4.53E-02 | Secreted                        | N- and C-terminus |
| Q96B86 | Repulsive guidance molecule A        | 147 | 5.44%  | 2.10E-02 | Cell membrane                   | N- and C-terminus |
| P10600 | Transforming growth factor beta-3    | 280 | 5.00%  | 5.96E-03 | Secreted                        | N-terminus        |
| Q9BZD6 | Proline-rich Gla protein 4           | 32  | 9.38%  | 3.68E-02 | Cell membrane                   | N-terminus        |
| Q8N2E6 | Prosalusin                           | 163 | 5.52%  | 1.37E-02 | Secreted                        | N-terminus        |
| O43915 | Vascular endothelial growth factor D | 216 | 6.02%  | 1.66E-03 | Secreted                        | N- and C-terminus |

All human proteins with annotated propeptides in the UniProt database that have more histidine in their propeptides than expected, assuming a 2.3% probability of histidine at each sequence position, with a significance level of 5%.
